# Supplementary material for: Association between Habitual Tea Consumption and Metabolic Syndrome and Its Components among Chinese Adults Aged 18~59 Years: Based on China Nutrition and Health Surveillance 2015–2017
Source: MDPI journal article supplement (doi:10.3390/nu14173502), 2022-08-25
Supplement: s1 [file s1]

**Table S1.** Total energy intake, anthropometric index, and biomarkers of MetS among participants

| Biomarkers*              | Habitual tea consumption ( $\bar{x}\pm SD$ ) |              |              |                 | <i>p</i> for trend |
|--------------------------|----------------------------------------------|--------------|--------------|-----------------|--------------------|
|                          | None                                         | 1~2 cups/day | 3~4 cups/day | Over 5 cups/day |                    |
| E (Kcal/d)               | 2296.3±855.2                                 | 2463.6±879.4 | 2487.7±901.2 | 2534.2±936.8    | <0.0001            |
| BMI (kg/m <sup>2</sup> ) | 24.2±3.61                                    | 24.4±3.6     | 24.56±3.65   | 24.36±3.71      | <0.0001            |
| WC (cm)                  | 81.69±10.01                                  | 82.94±10.2   | 84.07±10.24  | 84.3±10.45      | <0.0001            |
| SBP (mmHg)               | 129.81±18.99                                 | 129.54±18.55 | 130.05±18.02 | 130.99±18.5     | <0.0001            |
| DBP (mmHg)               | 78.49±11.42                                  | 79.08±11.64  | 79.67±11.61  | 80.83±12.02     | <0.0001            |
| FPG (mmol/L)             | 5.32±1.37                                    | 5.29±1.36    | 5.36±1.53    | 5.35±1.47       | 0.063              |
| TC (mmol/L)              | 4.7±0.94                                     | 4.72±0.98    | 4.74±0.96    | 4.74±0.93       | 0.007              |
| TG (mmol/L)              | 1.47±1.13                                    | 1.55±1.18    | 1.59±1.27    | 1.55±1.22       | <0.0001            |
| HDL-C (mmol/L)           | 1.29±0.32                                    | 1.25±0.32    | 1.26±0.33    | 1.28±0.35       | 0.073              |
| LDL-C (mmol/L)           | 2.91±0.83                                    | 2.95±0.86    | 2.96±0.85    | 2.94±0.83       | 0.012              |

\*Abbreviations: E: dietary energy; BMI: body mass index; WC: waist circumference; SBP: systolic blood pressure; DBP: diastolic blood pressure; FPG: fasting plasma glucose; TC: total cholesterol; TG: triglyceride; HDL-C: high-density lipoprotein cholesterol; LDL-C: low-density lipoprotein cholesterol.

**Table S2.** Subgroup analysis of associations between MetS and habitual tea consumption

| Subgroup           | n of overall (%) | OR (95% CI)* |                      |                      |                      | p for interaction |
|--------------------|------------------|--------------|----------------------|----------------------|----------------------|-------------------|
|                    |                  | None         | 1~2 cups/day         | 3~4 cups/day         | Over 5 cups/day      |                   |
| Age                |                  |              |                      |                      |                      | 0.067             |
| 18~<30             | 5510 (12.59%)    | Ref.         | 1.056 (0.792, 1.409) | 0.9 (0.594, 1.364)   | 0.804 (0.536, 1.206) |                   |
| 30~<45             | 13,711 (31.33%)  | Ref.         | 0.943 (0.817, 1.089) | 0.893 (0.755, 1.056) | 0.818 (0.699, 0.958) |                   |
| 45~59              | 24,536 (56.07%)  | Ref.         | 0.99 (0.895, 1.094)  | 0.924 (0.827, 1.033) | 0.864 (0.785, 0.951) |                   |
| Physical activity  |                  |              |                      |                      |                      | 0.6346            |
| Low                | 10,178 (23.26%)  | Ref.         | 0.855 (0.723, 1.01)  | 0.859 (0.713, 1.034) | 0.848 (0.721, 0.996) |                   |
| Medium             | 10,743 (24.55%)  | Ref.         | 0.966 (0.825, 1.131) | 0.873 (0.728, 1.047) | 0.802 (0.684, 0.94)  |                   |
| High               | 22,836 (52.19%)  | Ref.         | 1.051 (0.942, 1.173) | 0.948 (0.835, 1.075) | 0.842 (0.752, 0.943) |                   |
| Sleep duration (h) |                  |              |                      |                      |                      | 0.7935            |
| <7                 | 7533 (17.22%)    | Ref.         | 0.886 (0.731, 1.072) | 0.969 (0.779, 1.205) | 0.809 (0.672, 0.974) |                   |
| 7~8                | 27,144 (62.03%)  | Ref.         | 1.023 (0.926, 1.129) | 0.901 (0.806, 1.009) | 0.837 (0.756, 0.928) |                   |
| ≥9                 | 9080 (20.75%)    | Ref.         | 0.953 (0.794, 1.144) | 0.886 (0.715, 1.097) | 0.854 (0.715, 1.02)  |                   |
| Current smoker     |                  |              |                      |                      |                      | 0.0451            |
| No                 | 32,376 (73.99%)  | Ref.         | 0.949 (0.864, 1.041) | 0.873 (0.78, 0.978)  | 0.782 (0.704, 0.869) |                   |
| Yes                | 11,381 (26.01%)  | Ref.         | 1.116 (0.96, 1.298)  | 1.004 (0.86, 1.171)  | 0.938 (0.825, 1.066) |                   |
| Excessive drinking |                  |              |                      |                      |                      | 0.0359            |
| No                 | 39,431 (90.11%)  | Ref.         | 0.965 (0.887, 1.05)  | 0.888 (0.806, 0.979) | 0.799 (0.731, 0.873) |                   |
| Yes                | 4326 (9.89%)     | Ref.         | 1.16 (0.914, 1.473)  | 1.084 (0.848, 1.386) | 1.056 (0.872, 1.279) |                   |

\*Adjusted (corresponding stratified variable was not included) for gender, age, BMI, living area, education level, income, marital status, current smoker (Yes/No), excessive drinking (Yes/No), physical activity, sleeping duration, sedentary behavior, medical examination within one year (Yes/No), DASH-diet score, daily energy intake (Kcal/day), and family history for hypertension and diabetes; Indicated by odds ratio (OR) and 95% confidence interval (CI).
